# Supplementary material for: Electrochemical Preparation of Synergistic Nanoantimicrobials
Source: PubMed Central journal article supplement (PMC6983245; doi:10.3390/molecules25010049), 2019-12-22
Supplement: molecules-25-00049-s001.pdf [file molecules-25-00049-s001.pdf]

## Supplementary Material

**Table S1.** CuNPs@BAC morphological results obtained varying the electrochemical parameters during the preparation process.

| TEM image                                                                           | Dimensional histogram                                                                | Electrochemical parameters |
|-------------------------------------------------------------------------------------|--------------------------------------------------------------------------------------|----------------------------|
| 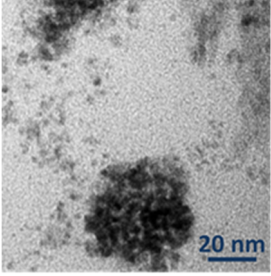   | -agglomerates-                                                                       | BAC=0.01 M<br>WP=1.5 V     |
|   |   | BAC=0.2 M<br>WP=1.5 V      |
|  |  | BAC=0.2 M<br>WP=2.5 V      |

**Table S2.** AgNPs and CuNPs concentrations in the liquid G medium. Initial concentration was  $10^{-4}$  g/mL (= 100  $\mu\text{g/mL}$ ).

| dilution | concentration / $\mu\text{g/mL}$ |
|----------|----------------------------------|
| 2        | 50                               |
| 4        | 25                               |
| 8        | 12.5                             |
| 16       | 6.25                             |
| 32       | 3.125                            |
| 64       | 1.5625                           |
| 128      | 0.78125                          |

**Table S3.** *Plateau* values for copper release from three types of fabrics modified by CuNPs@BAC nanoparticles at two different CuNPs concentrations.

| <b>Fabric</b>                 | <b>CuNPs concentration / gL<sup>-1</sup></b> | <b>[Cu]<sub>plateau</sub> / ppb</b> |
|-------------------------------|----------------------------------------------|-------------------------------------|
| (a) 100% polyestere           | 0.05                                         | 150±10                              |
|                               | 0.5                                          | 160±10                              |
| (b) 60% cotton-40% polyestere | 0.05                                         | 100±20                              |
|                               | 0.5                                          | 290±20                              |
| (c) 35% cotton-65% polyestere | 0.05                                         | 20±5                                |
|                               | 0.5                                          | 60±5                                |
